# Supplementary material
Source: publisher site journal article supplement (https://www.dovepress.com/article/222655)

1

## Supplemental Materials

2

1 **Figure Legends**

2 **Figure S1.** Mean values from baseline to 20-week follow-up for measures of daily activity (A, B), blood  
3 pressure (C, D), aerobic capacity (E), and waist circumference (F). Data are expressed as adjusted mean  
4 change  $\pm$  standard error. Data are unadjusted for baseline values, age, and sex. Steps per day and  
5 sedentary time are adjusted for wear time of the accelerometer.

6 **Figure S2.** Mean values from baseline to 20-week follow-up for lipid (A-D) and fasting glucose (E, F).  
7 Data are expressed as mean change  $\pm$  standard error. Data are unadjusted for baseline values, age, and  
8 sex. LDL cholesterol: Low-density lipoprotein cholesterol; HDL cholesterol: High-density lipoprotein  
9 cholesterol.

10 **Figure S3.** Mean values from baseline to 20-week follow-up for biomarkers of inflammatory (A-D) and  
11 oxidative stress (E, F). Data are expressed as adjusted mean change  $\pm$  standard error. Data are  
12 unadjusted for baseline values, age, and sex. Log-transformation was used to normalize data  
13 distribution. TNF- $\alpha$ : tumor necrosis factor  $\alpha$ ; IL-6: interleukin-6; E-selectin: endothelium selectin; VCAM-1:  
14 vascular cell adhesion molecule-1; MPO: myeloperoxidase; oxLDL: oxidized low-density lipoprotein.

15

**Table S1.** Changes in supportive performance outcome measures unadjusted for baseline status

| Outcome                         | EX + NEPA            | EX                   | Between Group Difference |
|---------------------------------|----------------------|----------------------|--------------------------|
|                                 | Baseline to 20-Weeks | Baseline to 20-Weeks | 20-Weeks                 |
| SPPB                            | 0.4 (-0.1, 0.9)      | 0.2 (-0.3, 0.7)      | 0.2 (-0.6, 0.9)          |
| 4-m walk speed (m/s)            | -0.03 (-0.09, 0.04)  | 0.02 (-0.04, 0.8)    | -0.05 (-0.13, 0.04)      |
| Dominant hand grip strength     | -0.7 (-2.8, 1.4)     | 1.2 (-0.8, 3.1)      | -1.9 (-4.8, 1.0)         |
| Non-dominant hand grip Strength | -0.7 (-2.9, 1.5)     | 0.2 (-1.7, 2.2)      | -1.0 (-3.9, 2.0)         |

Values are expressed as mean difference with 95% confidence intervals. Within group difference represents 20 weeks relative to baseline. Between group difference represents EX + NEPA relative to EX at 20 weeks. SPPB: Short Physical Performance Battery.

1

2

**Table S2.** Changes in dietary intake.

| Outcome               | EX + NEPA              | EX                    | Between Group Difference |
|-----------------------|------------------------|-----------------------|--------------------------|
|                       | Baseline to 20-Weeks   | Baseline to 20-Weeks  | 20-Weeks                 |
| Calories (kcal/day)   | -265.4 (-656.8, 126.0) | -64.7 (-421.2, 291.9) | -200.8 (-730.2, 328.7)   |
| Carbohydrates (g/day) | -37.8 (-85.8, 10.2)    | -11.4 (-55.2, 32.4)   | -26.4 (-91.4, 38.6)      |
| Protein (g/day)       | -1.2 (-20.5, 18.1)     | -7.6 (-25.3, 10.0)    | 6.4 (-19.8, 32.6)        |
| Fat (g/day)           | 0.5 (-20.9, 21.9)      | -1.9 (-21.4, 17.6)    | 2.4 (-26.5, 31.4)        |
| Saturated fat (g/day) | 2.8 (-5.6, 11.1)       | -2.6 (-10.2, 5.0)     | 5.3 (-5.9, 16.6)         |
| Cholesterol (mg/day)  | -52.0 (-129.1, 25.1)   | -19.5 (-89.7, 50.7)   | -32.5 (-136.8, 71.8)     |
| Fiber (g/day)         | -2.8 (-10.4, 4.6)      | -3.3 (-10.3, 3.7)     | 0.5 (-9.8, 10.8)         |
| Sugar (g/day)         | -23.0 (-44.6, 1.4)     | 1.3 (-18.5, 21.0)     | -24.3 (-53.5, 5.0)       |
| Water (g/day)         | -418.7 (-802.1, -35.3) | 386.1 (37.6, 734.5)   | -804.7 (-1323, -286.7)   |

Values are expressed as mean difference with 95% confidence intervals. Within group difference represents 20 weeks relative to baseline. Between group difference represents EX + NEPA relative to EX at 20 weeks.

1

2

1 Fig S1.

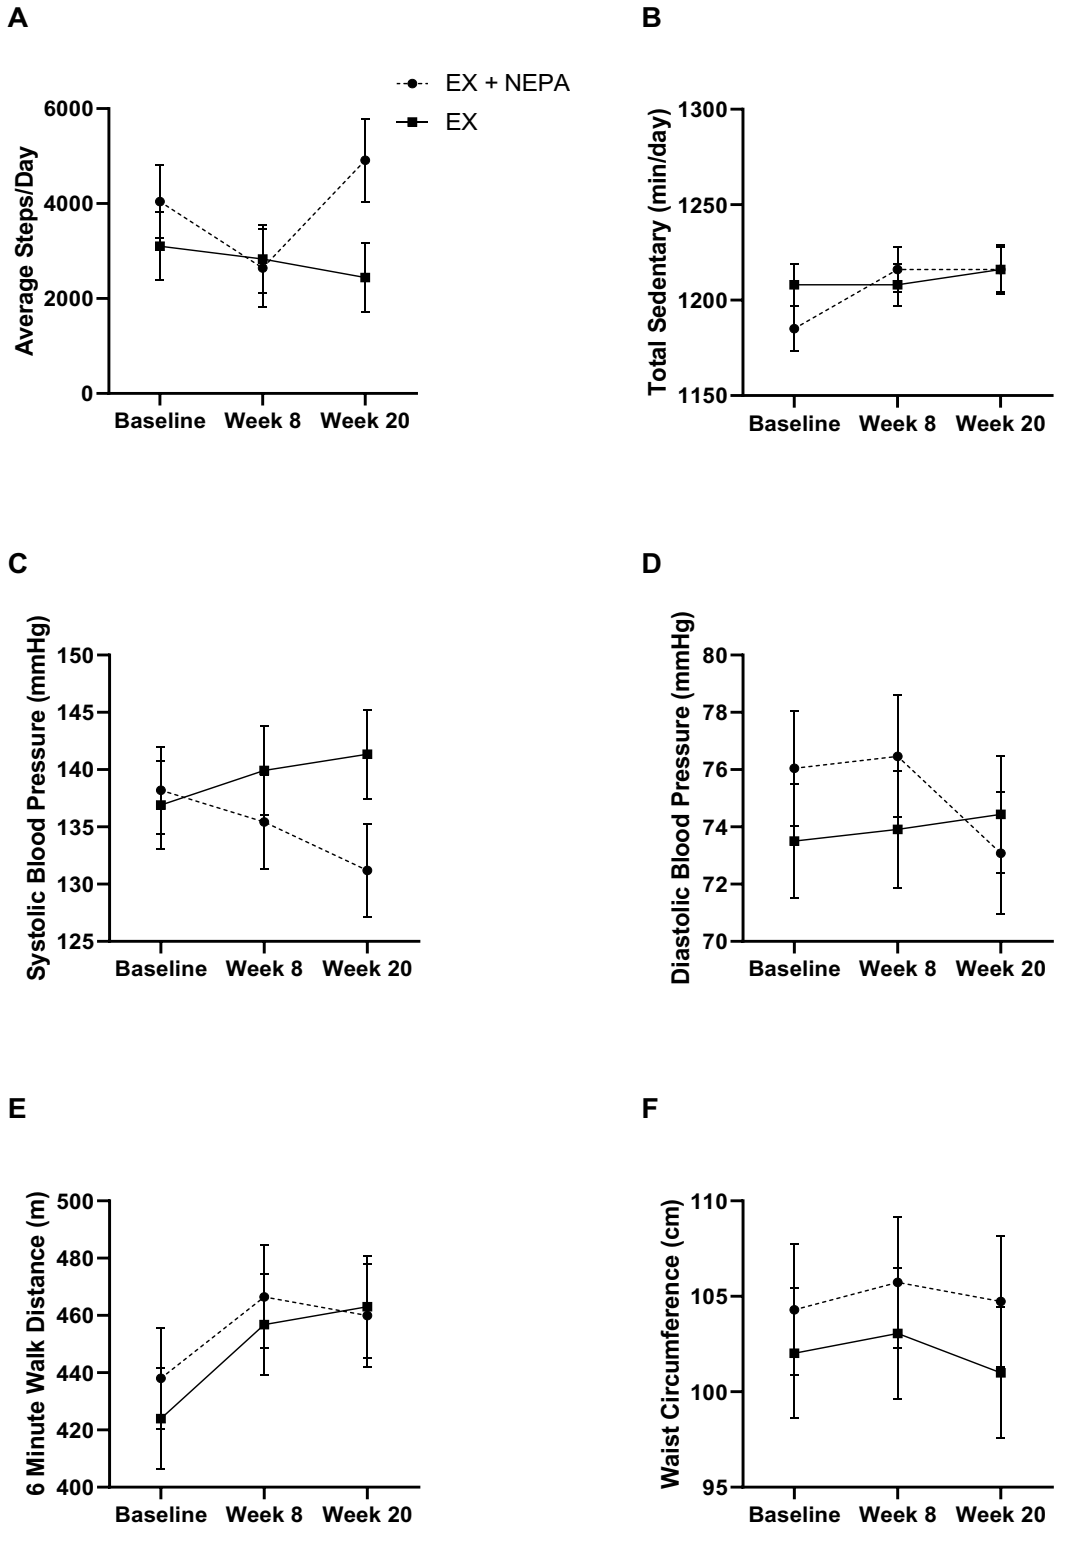

2

1 Fig S2.

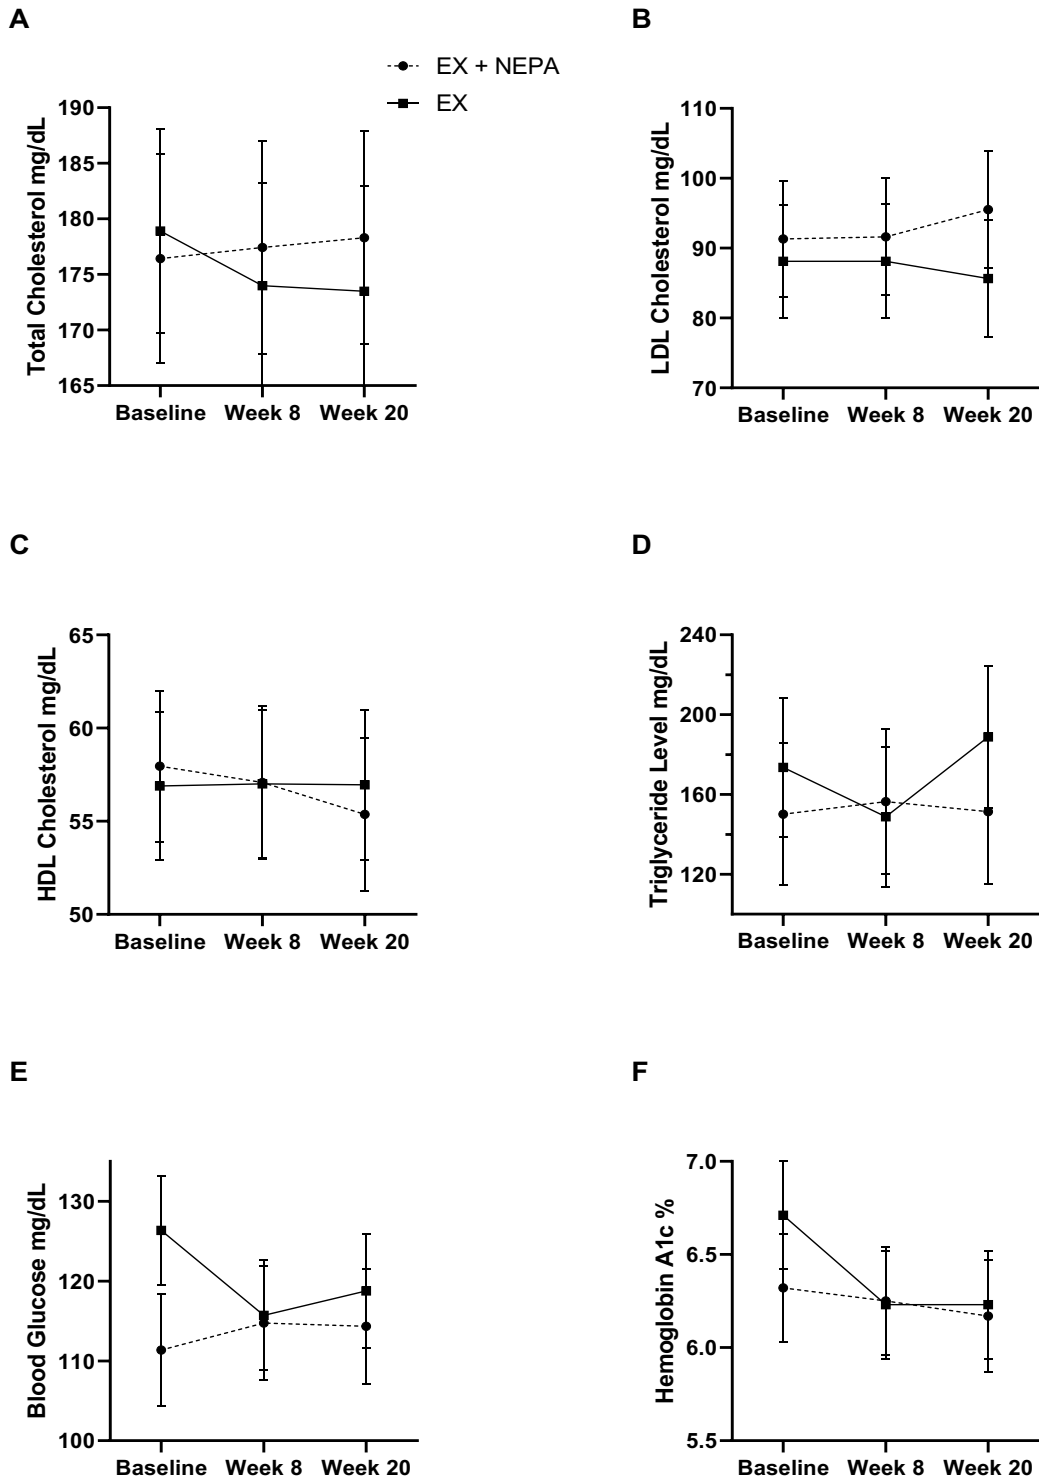

2

1 Fig S3.

A

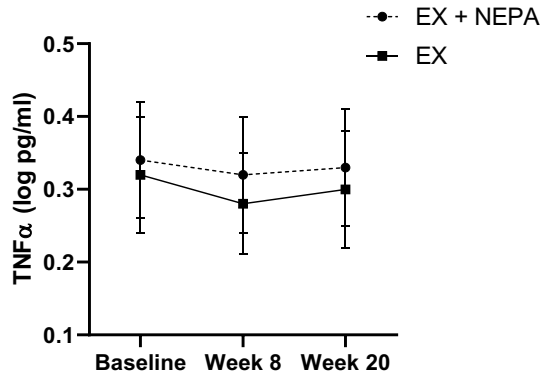

B

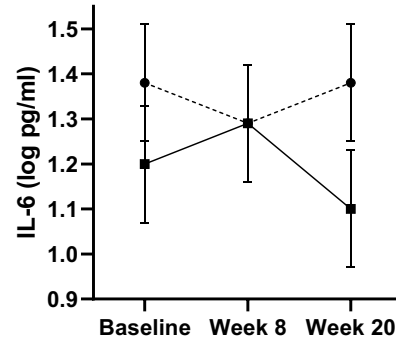

C

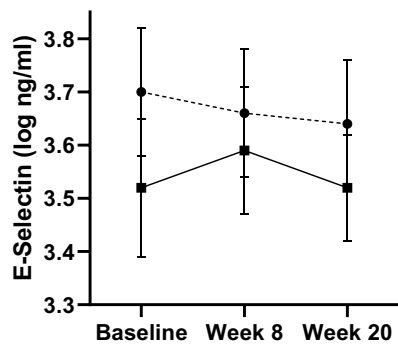

D

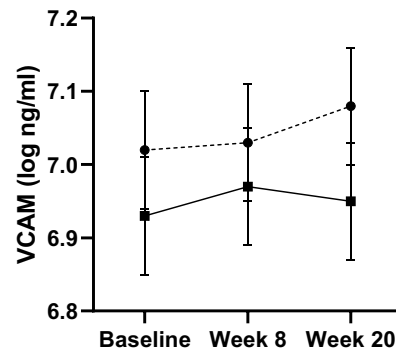

E

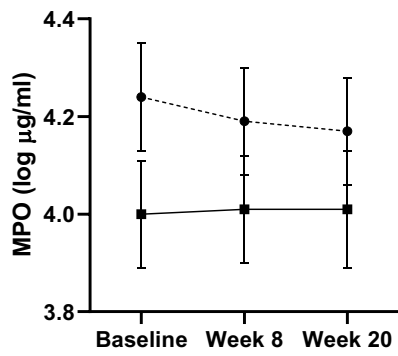

F

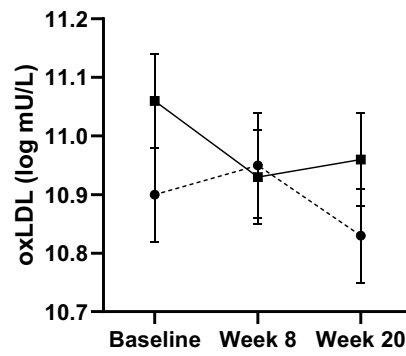

Supplement: Supplementary file 1 [file get_supplementary_file.php]
